# Microcosm cultures of a complex synthetic community reveal ecology and genetics of gut microbial organization

Xiaofan Jin<sup>1\*</sup>, Feiqiao B. Yu<sup>2,3\*</sup>, Jia Yan<sup>2,3</sup>, Allison Weakley<sup>2,3</sup>, and Katherine S. Pollard<sup>1,2,4,\*\*</sup>

<sup>1</sup>Gladstone Institutes, San Francisco, USA

<sup>2</sup>Chan-Zuckerberg Biohub, San Francisco, USA

<sup>3</sup>ChEM-H Institute, Stanford University, Stanford, USA

<sup>4</sup>University of California San Francisco, San Francisco, USA

\*\*Corresponding author: [katherine.pollard@gladstone.ucsf.edu](mailto:katherine.pollard@gladstone.ucsf.edu)

**Running title:** Mucin microcosm culture of complex synthetic gut community

**Keywords:** mucosa lumen biogeography, microcosm, biofilm, gut microbiome, adhesion, colonization

## Abstract

The behavior of microbial communities depends on both taxonomic composition and physical structure. Metagenomic sequencing of fecal samples has revealed the composition of human gut microbiomes, but we remain less familiar with the spatial organization of microbes between regions such as lumen and mucosa, as well as the microbial genes that regulate this organization. To discover the determinants of spatial organization in the gut, we simulate mucosal colonization over time using an *in vitro* culture approach incorporating mucin hydrogel microcosms with a complex yet defined community of 123 human strains for which we generated high-quality genome assemblies. Tracking strain abundance longitudinally using shotgun metagenomic measurements, we observe distinct and strain-specific spatial organization in our cultures with strains enriched on mucin microcosms versus in supernatant, reminiscent of mucosa versus lumen enrichment *in vivo*. Our high taxonomic resolution data enables a comprehensive search for microbial genes that underlie this spatial organization. We identify gene families positively associated with microcosm-enrichment, including several known for biofilm and adhesion functions such as efflux pumps, gene expression regulation, and membrane proteases, as well as a novel link between a coenzyme F420 hydrogenase gene family and lipo/exopolysaccharide biosynthesis. Our strain-resolved abundance measurements also demonstrate that incorporation of microcosms yields a more diverse community than liquid-only culture by allowing co-existence of closely related strains. Altogether these findings demonstrate that microcosm culture with synthetic communities can effectively simulate lumen versus mucosal regions in the gut, providing measurements of microbial organization with high taxonomic resolution to enable identification of specific bacterial genes and functions associated with spatial structure.

## Main

Human gut microbiomes consist of diverse microbial taxa [1, 2], with typical complexity ranging on the order of over a hundred species in a single individual [3]. Spatial organization of gut microbes is linked to community function and host health [4–10] – in particular, different taxa are enriched between mucosa and lumen [11–16], and mucosal colonizing bacteria may be particularly able to regulate host-microbiome interactions and immunomodulation [17–21]. However, we still lack a high-taxonomic-resolution view of ecological differences between lumen and mucosa, and accordingly possess a limited understanding of genetic factors underlying this spatial structure. As within-species dynamics exist within gut microbiomes [22–25], we hypothesize that distinct spatial organization may (i) occur at the

31 level of individual strains, and (ii) be associated with specific gene families and pathways that regulate  
32 mucosa versus lumen colonization.

33 To test our hypotheses, we develop an integrated experimental-computational workflow that compares  
34 lumen- and mucosal-like niches within a complex gut community. By using metagenomic sequencing, we  
35 are able to profile microbes with high taxonomic resolution, enabling strain- and gene-level analysis. We  
36 use a synthetic 123 strain community modeled closely after the recently published hCom2 community  
37 [26,27], cultured *in vitro* with added mucin microcosms to provide a mucosal-like substrate for bacterial  
38 attachment distinct from the surrounding liquid supernatant [28,29]. To identify genetic correlates of  
39 microcosm colonization, we develop a computational workflow that uses a comprehensive search across  
40 KEGG Orthology (KO) gene families [30] to identify associations between gut spatial organization and  
41 underlying microbial genotypes, using phylogenetic regression to account for evolutionary relationships  
42 between taxa [31–33].

43 Our approach provides key advantages over existing alternatives: first, by using an *in vitro* approach  
44 that allows mucin microcosm and supernatant subpopulations to be independently sampled [29] –  
45 analogous to mucosa and lumen *in vivo* – we obtain information on spatial structure missing from stool  
46 sampling and traditional liquid culture. Independent sampling of lumen and mucosal subpopulations is  
47 also possible using *in vivo* human gut biopsy, but the invasiveness of this approach limits sample sizes  
48 and longitudinal measurements [34]. In contrast, our *in vitro* platform enables us to sample mucosal-  
49 and lumen-like community subpopulations across multiple passage timepoints, with statistical replicates.  
50 Second, using our defined 123-strain community – which we generate high quality genomes for each  
51 member therein – allows us to emulate the bacterial complexity found in human guts, yet still accurately  
52 quantify abundance using metagenomic sequencing even between closely related strains. Strain-level  
53 measurements are critical for enabling gene-level analysis, as they allow genetic comparisons between  
54 closely related taxa. By comparison, earlier work with microcosms used 16S sequencing of undefined  
55 communities to produce measurements with more limited taxonomic resolution and did not examine  
56 genes associated with microcosm colonization [29].

57 We demonstrate that this approach yields detailed strain-level measurements of differential spatial or-  
58 ganization, revealing taxa which are reproducibly enriched or depleted on mucin microcosms relative to  
59 supernatant. Then, we identify numerous genes and biosynthetic gene clusters that distinguish micro-

60 cosm versus supernatant genomes consistently across phylogenetic lineages, including genes related to  
61 cell adhesion and biofilm formation whose presence differs between closely related strains with distinct  
62 microcosm enrichment profiles.

## 63 **Results**

### 64 **Closed genomes enable strain-level metagenomic profiling of complex defined microbial** 65 **communities**

66 Starting from isolate cultures of 123 bacterial strains that are prevalent in the human gut microbiome  
67 (Fig. 1A, Table S1), we first generate high-quality, contiguous genomes for all strains other than five  
68 with closed genomes already. For the other 118 strains, we perform hybrid assembly of long Nanopore  
69 (median  $3.9 \times 10^4$  reads/strain) and short Illumina reads (median  $1.7 \times 10^6$  reads/strain) (Fig. S1,  
70 Methods), successfully generating closed assemblies with no more than 10 contigs. By contrast, the  
71 closest available NCBI genome (Fig. 1A) is more fragmented (78/123 comprise more than 10 contigs)  
72 and less closely related to the strain in our defined community; 20/123 have  $> 0.1\%$  ANI difference  
73 to our strain, and 33/123 contain 100 or more differential KEGG Orthology (KO) gene families (see  
74 Methods, Fig. S2). Thus, our reference database of closed genomes that are exact strain matches is  
75 critical for accurate strain and gene-level characterization of metagenomic data. Next, isolate strains  
76 are combined into a single community using anaerobic automated liquid handling (See Methods, Fig.  
77 S3), and inoculated into cultures containing 0.5% mucin 1% agar microcosms and MEGA media with  
78 6 3-day passages (Fig. 1B, Methods). As a control, we also culture in parallel the same inoculum  
79 with MEGA media only, i.e., liquid-only culture. We use metagenomic sequencing of microcosms and  
80 supernatant sampled independently ( $1.2 \times 10^7$  read pairs per sample) at each passage to quantify strain  
81 relative abundances (see Methods, Fig. S4). To analyze read libraries with high taxonomic resolution,  
82 we use NinjaMap [27] with our custom genome database to generate strain-level abundances (Fig. 1C,  
83 Table S2) – we successfully validate NinjaMap results against lower taxonomic resolution species-level  
84 abundances generated using Kraken2 [35] with the UHGG database [2] (median  $R^2 = 0.978070$  across  
85 samples, see Fig. S5).

86 **Mucin microcosms increase community richness and promote strain-coexistence within**  
87 ***in vitro* cultures**

88 Next, we characterize differences that result from spatial structure introduced by the incorporation  
89 of mucin microcosms. In cultures without microcosms, community richness drops from a median of  
90 113.5/123 detected strains in the inoculum (detection cutoff 0.01% relative abundance, 1% horizontal  
91 coverage – some strains with non-viable glycerol stocks / isolates did not grow to sufficient ODs, see Fig.  
92 S7), stabilizing down to a median of 38.5/123 detected strains by the 4 late passages (passages P2-6,  
93 i.e., days 9-18). By contrast, microcosm cultures seeded with the same inoculum stabilize to a median of  
94 62.5/123 and 65.5/123 detectable strains on microcosms and supernatant respectively (Fig. 1D). This  
95 significantly elevated richness ( $(p < 1^{-5})$ , see Fig. S6) parallels results from hCom2 inoculated in mice  
96 (median 56/119 detected strains across 19 mice) [26], suggesting cultures with microcosms provide  
97 a closer analog to *in vivo* conditions than do liquid-only cultures. Increased richness is particularly  
98 noticeable in Firmicutes, Firmicutes\_A, and Bacteroidota (see Fig. S6), while total abundance is higher  
99 for Firmicutes and Firmicutes\_A, but lower in Bacteroidota (Fig. 1E).

100 Beyond phylum level effects, abundance shifts also occur at strain level. Addition of microcosms increases  
101 abundance for a diverse set of strains including *Bacteroides caccae* ATCC-43185, *Lactobacillus ruminis*  
102 ATCC-25644, *Coprococcus comes* ATCC-27758 (which displays extremely sticky / slime phenotype  
103 in pure culture), two strains in family Marinifilaceae (*Butyrlicimonas virosa* DSM-23226, *Odoribacter*  
104 *splanchnicus* DSM-20712), and both sulfur reducing bacteria (*Desulfovibrio piger* ATCC-29098 and  
105 *Bilophila wadsworthia* ATCC-49260 from phylum Desulfobacterota). Some taxa are largely unaffected by  
106 microcosms, such as three Bifidobacterium strains, while few taxa are negatively affected by microcosms,  
107 with three closely related Veillonella strains being notable exceptions (see Fig. S8). These strain-level  
108 abundance shifts do not always align with corresponding phylum-level shifts, emphasizing the value of  
109 our highly-resolved taxonomic measurements.

110 One of the most striking abundance shifts revealed by strain-level analysis is the co-existence of closely  
111 related strains with the addition of microcosms. In liquid-only culture, *Bacteroides dorei* DSM-17855  
112 outcompetes two closely related (ANI > 99%) strains, *Bacteroides dorei* 5-1-36-D4 and *Bacteroides sp.*  
113 9-1-42FAA (Fig. 1F). By contrast, these three strains coexist stably in culture when microcosms are  
114 present. Other examples can be found between two closely related (ANI ~ 80%) Firmicutes\_A strains:

115 *Subdoligranulum* sp. 4-3-54A2FAA and *Subdoligranulum variabile* DSM-15176 (Fig. 1G), and between  
116 two closely related (ANI ~ 80%) Firmicutes\_C strains: *Acidaminococcus fermentans* DSM-20731 and  
117 *Acidaminococcus intestini* D21 (Fig. 1H). These observations of co-existence (see Fig. S8 for additional  
118 examples) concur with increased richness detected in microcosm cultures.

119 To better understand why community richness increases with mucin microcosms, we additionally grow  
120 our inoculum in cultures with 1% agar microcosms (plain-agar, i.e., no mucin). We observe that  
121 plain-agar microcosm culture also exhibits overall enhanced richness compared with liquid-only culture  
122 (Fig. S6). However, we do note some specific strain-level differences between mucin-agar and plain-  
123 agar microcosm cultures (See Fig. S7,S8). This suggests that increased richness result largely – but  
124 not entirely – from having a physical surface to colonize rather than the nutrients provided by mucin.  
125 These results are reminiscent of similar effects in bacterial biofilms, where increased diversity has been  
126 attributed to expanded spatial niches and reduced competition [36–38].

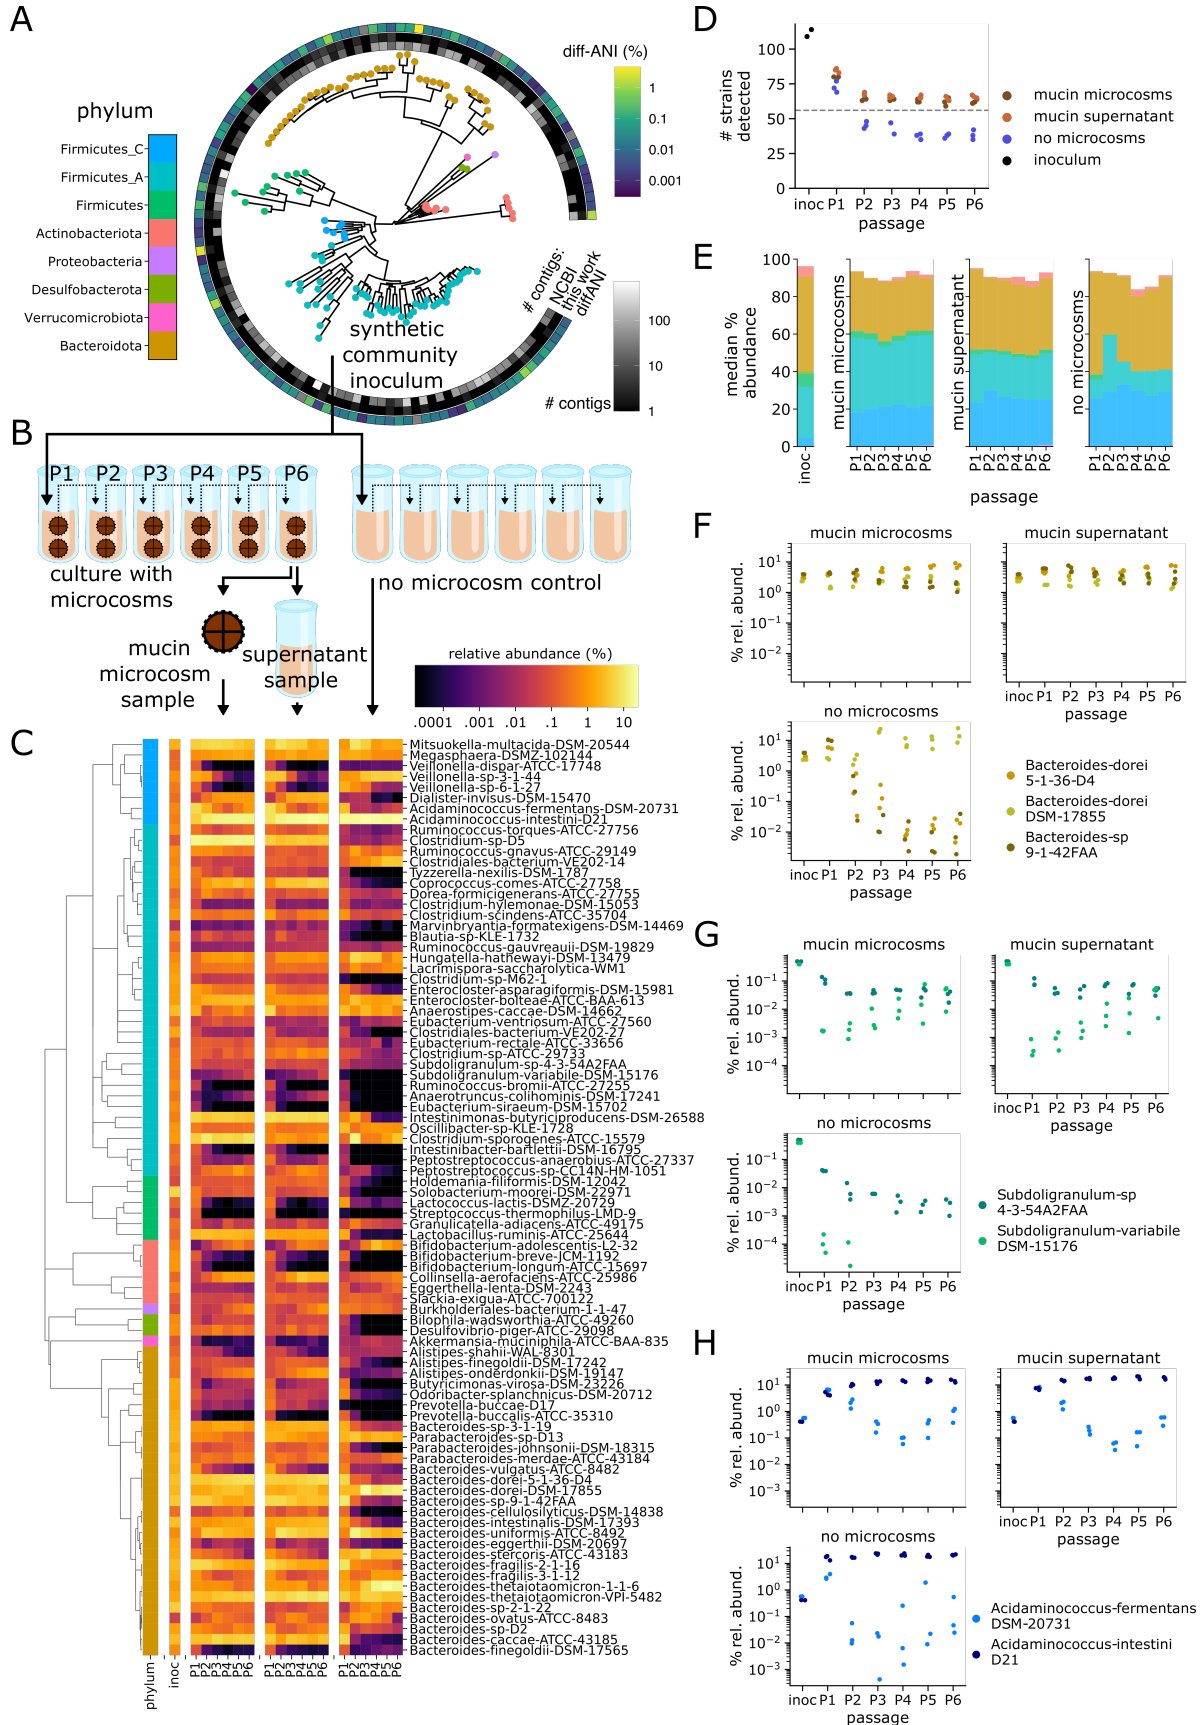

Figure 1: **(Previous page) Microcosm cultures yield stable, diverse communities with coexistence of closely related strains.** **(A)** We generate closed, high quality genomes for each strain in a 123-member microbial community, representative of taxa in the human gut. De novo generated genomes are more contiguous than closest previously available NCBI genomes, and represent exact matches to our strains. **(B)** We use this 123-member community to inoculate cultures incorporating mucin microcosms as well as non-microcosm controls. We passage (P) each culture 6 times (3 days between passages), independently sampling bacterial DNA from microcosm, supernatant, and no-microcosm control at each timepoint for downstream metagenomic sequencing. **(C)** We use NinjaMap to obtain community relative abundances from metagenomic sequencing data, here we plot median abundance of each strain at each passage timepoint, across experimental conditions. **(D)** Number of detected strains after culture stabilization ( $\sim$ P3 and later) is higher in microcosm versus no microcosm cultures, indicating enhanced community richness. Grey dashed line indicates median number of strains detected (56) using same threshold with the 119-member hCom2 community in mice [26] **(E)** Addition of microcosms leads to broad taxonomic shifts in community composition relative to no-microcosm control, visualized here at phylum level. **(F)** Strain-resolved abundance patterns of 3 *B. dorei* strains ( $ANI > 99\%$ ) in our community demonstrates stable co-existence enabled by addition of microcosms, compared with dominance of a single *B. dorei* strain without microcosms. **(G)** Strain-resolved abundance patterns of 2 *Subdoligranulum* strains ( $ANI \sim 80\%$ ) in our community demonstrates stable co-existence enabled by addition of microcosms. *Subdoligranulum variable* DSM-15176 in particular also exhibits increasing abundance over passage timepoints. **(H)** Strain-resolved abundance patterns of 2 *Acidaminococcus* strains ( $ANI \sim 80\%$ ) demonstrates more stable co-existence when cultured in the presence of microcosms.

127 **Strains exhibit distinct enrichment profiles between microcosm and supernatant com-**  
128 **munities**

129 We next characterize spatial organization *within* microcosm cultures by comparing subpopulations sam-  
130 pled from microcosm and supernatant, testing our hypothesis that strain-level spatial differences occur  
131 within gut communities. For the 86/123 prevalent strains that are detected in at least 10% of passaged  
132 samples (see Methods), we quantify a microcosm enrichment score – defined as the log fold change  
133 in abundance between paired microcosm and supernatant samples (i.e., derived from the same culture  
134 tube) – for each strain and each passage (Fig. 2A, Table S3). We also calculate a single aggregate,  
135 normalized log-microcosm-enrichment score for each strain based on late passage measurements (see  
136 Methods). These scores reflect the preference of each strain to grow on microcosms versus in the  
137 supernatant, with positive scores indicating microcosm preference.

138 Aggregating at phylum level, we observe enrichment toward mucin microcosms in Desulfobacterota,  
139 Firmicutes (primarily Bacillus-like), and Firmicutes\_A (primarily Clostridia-like), and enrichment toward  
140 supernatant in Actinobacteriota, Bacteroidota, and Firmicutes\_C (primarily Negativicutes-like), with



141 no obvious time-dependent signal (Fig. 2B). These results are largely consistent between mucin-agar  
142 and plain-agar microcosms, with the exception of Desulfobacterota which is not enriched on plain-agar  
143 microcosms. Certain individual strains also exhibit similar trends, such as *Eubacterium ventriosum*  
144 ATCC-27560 which exhibits microcosm preference with mucin-agar microcosms but not plain-agar (Fig.  
145 S9).

146 At strain level, we find a diverse range of enrichment profiles over time (Fig 2A), including several  
147 strains with opposite enrichment relative to their phylum. For instance, *Bacteroides sp.* 2-1-22 prefers  
148 microcosms, while *Clostridiales bacterium* VE-202-14 from phylum Firmicutes\_A prefers supernatant.  
149 Moreover, closely related strains can exhibit different enrichment phenotypes: *Bacteroides dorei* 5-1-  
150 36-D4 and DSM-17855 exhibit similar abundance in supernatant and microcosm (log enrichment scores  
151  $\approx 0$ ), but *Bacteroides sp.* 9-1-42FAA displays consistent enrichment toward supernatant (log enrichment  
152 scores  $< 0$ , see Fig. 2C). *Subdoligranulum variabile* DSM-15176 and *Acidaminococcus fermentans*  
153 DSM-20731 prefer mucin microcosms more than their respective counterparts, *Subdoligranulum sp.*  
154 4-3-54A2FAA (Fig. 2D) and *Acidaminococcus intestini* D21 (Fig. 2E). These findings support our  
155 hypothesis that distinct strain-level spatial organization occurs within gut communities.

156 Finally, as external validation we compare our *in vitro* microcosm enrichment results against an *in*  
157 *vivo* dataset [15] with paired mucosal and lumen samples (see Methods, Table S6). We find our  
158 *in vitro* microcosm-enrichment strain scores exhibit similarity to *in vivo* mucosal-enrichment species  
159 scores within inter-subject variability (Fig. S10, Table S7). We also observe general agreement at  
160 phylum level: Bacteroidota is enriched toward both supernatant *in vitro* and lumen *in vivo*, while  
161 Firmicutes\_A and Firmicutes are enriched toward microcosm / mucosa. However, discrepancies also  
162 exist, as Actinobacteriota is enriched toward supernatant *in vitro* and mucosa *in vivo* (Fig. S10). These  
163 results suggest that our experimental platform provides a close – though not exact – approximation of  
164 *in vivo* structure.

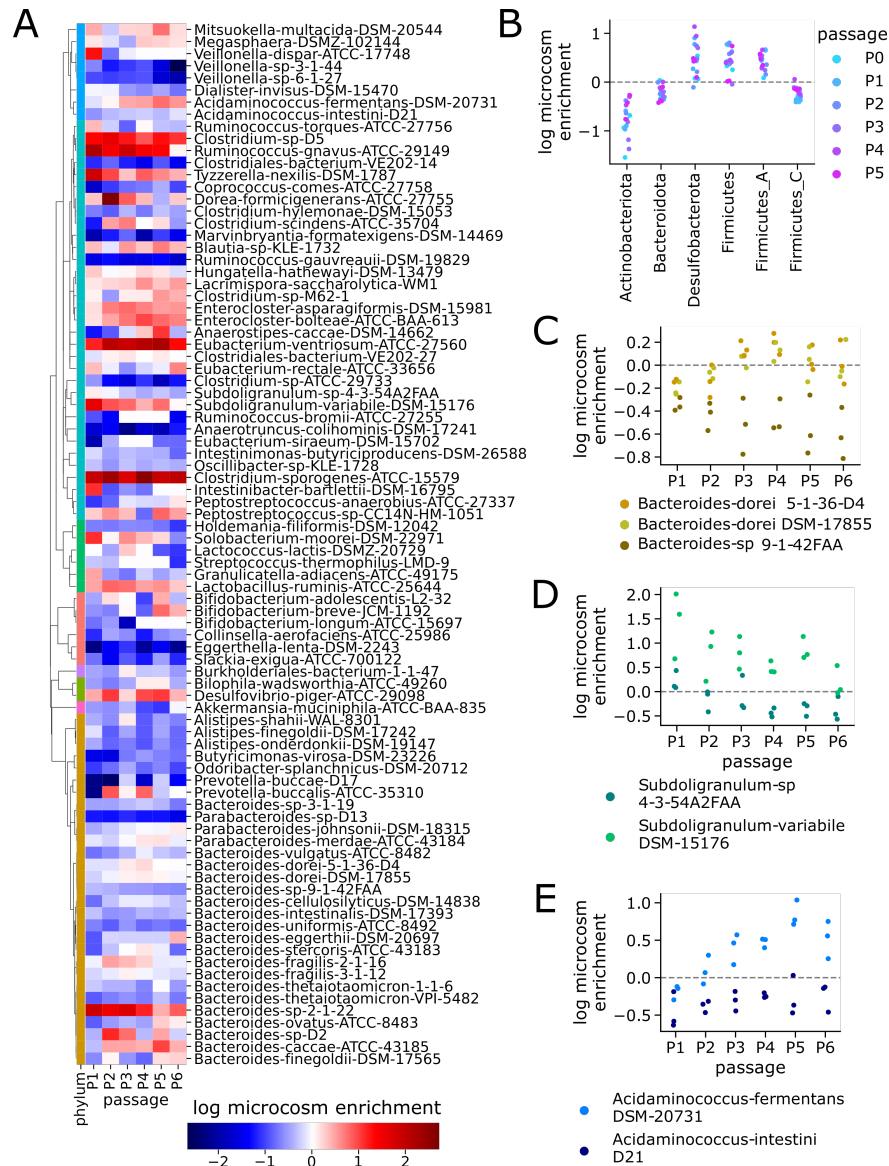

Figure 2: **Strain level differences exist between mucin microcosm and supernatant communities.** (A) Strains exhibit different microcosm enrichment phenotypes, both within and between clades – positive (red) scores indicate higher relative abundance on microcosms versus supernatant. (B) Aggregated at phylum level, taxa exhibit evidence of distinct spatial structure: Desulfobacterota, Firmicutes and Firmicutes\_A are enriched on microcosms, while Actinobacteriota, Bacteroidota and Firmicutes\_C are enriched in supernatant. (C) One of the three *Bacteroides dorei* strains (sp. 9-1-42FAA) exhibits consistent microcosm depletion relative to the other two strains (5-1-36-D4 and DSM-17855). (D) *Subdoligranulum variable* DSM-15176 exhibits consistent microcosm enrichment relative to the closely related strain *Subdoligranulum sp.* 4-3-54A2FAA. (E) *Acidaminococcus fermentans* DSM-20731 exhibits consistent microcosm enrichment relative to the closely related strain *Acidaminococcus intestini* D21. Additionally, microcosm enrichment of *Acidaminococcus fermentans* DSM-20731 increases with time towards later passages.

## 165 **Phylogenetic regression predicts genes associated with mucosal colonization**

166 We next test for statistical associations between microcosm enrichment and underlying microbial geno-  
167 types, evaluating our hypothesis that key microbial genes may regulate spatial organization in the gut.  
168 Using kofamscan [30] to comprehensively search all genomes against all defined KO families, we gen-  
169 erate a genotype matrix consisting of 9857 KOs detected in the 86 prevalent strains. Each entry in  
170 this  $86 \times 9857$  matrix corresponds to maximum kofamscan/hmmer bitscore hit for a particular KO in  
171 a particular genome (Fig. 3A) – higher scores reflect gene presence. We then test for each of the  
172 9857 KOs whether its genotype pattern across the 86 strains is significantly associated with the cor-  
173 responding pattern of microcosm enrichment scores (phenotype). We perform significance tests using  
174 phylogenetic regression with phylolm [32] to account for evolutionary relationships between strains (see  
175 Methods).

176 Our approach identifies 244 KO families significantly associated with increased enrichment on mucin mi-  
177 crocosms relative to supernatant applying FDR correction at  $p < 0.01$  threshold (Fig. 3B, see also Meth-  
178 ods, Table S8). Out of these KOs, we highlight several illustrative examples whose genotype patterns  
179 align with differential microcosm enrichment in the *B. dorei*, *Subdoligranulum* and *Acidaminococcus*  
180 strains featured in Fig. 2C-E. From the three *B. dorei* strains, we find two KO gene families in par-  
181 ticular – K00441 (coenzyme F420 hydrogenase subunit beta [EC:1.12.98.1], Fig. 3C, 4A) and K08217  
182 (MFS transporter, DHA3 family, macrolide efflux protein, Fig. 4B) – which have strong homology hits  
183 in *Bacteroides dorei* 5-1-36-D4 and DSM-17855, but not in *Bacteroides sp.* 9-1-42FAA. Mapping the  
184 K00441 coenzyme F420 hydrogenase hits to their genomic loci in 5-1-36-D4 and DSM-17855, we find  
185 the gene resides in the midst of lipo/exopolysaccharide (LPS/EPS) biosynthesis gene clusters (Fig. 3C).  
186 Performing gene neighborhood analysis across all 123 strain genomes to search for KOs enriched within  
187 10 kilobases (kb) of K00441 annotated genes, we find 107 hits (see Methods, Table S5), which are dom-  
188 inated by KOs with LPS/EPS biosynthesis functions including numerous glycosyltransferase, epimerase,  
189 sugar-reductase, polysaccharide membrane transporter genes, suggesting a previously uncharacterized  
190 link between coenzyme F420 hydrogenase and microbial LPS/EPS production.

191 Beside K00441 and K08217 in *B. dorei*, we also note a strong hit to a DEAD box helicase gene fam-  
192 ily – K14440, SWI/SNF-related matrix-associated actin-dependent regulator of chromatin subfamily  
193 A-like protein 1 [EC:3.6.4.12] – in *Subdoligranulum variabile* DSM-15176 (Fig. 4C) and a membrane

194 protease gene family – K14743, membrane-anchored mycosin MYCP [EC:3.4.21.-] – in *Acidaminococ-*  
195 *cus fermentans* DSM-20731 (Fig. 4D) which are absent in their less microcosm-enriched relatives.  
196 Intriguingly, LPS/EPS biosynthesis [39–43], membrane transporters/efflux pumps [44–50], membrane  
197 proteases [51–56], and DEAD box helicase gene regulators [41,57–60] all have known links to biofilm for-  
198 mation and adhesion. Aggregating all 244 microcosm-associated KOs by KEGG BRITE gene categories,  
199 we identify several BRITE categories enriched for significant KOs, representing antibiotic resistance  
200 genes, glycosyltransferases (E.C. 2.4), phosphotransferases (E.C. 2.7), transcriptional regulators, and  
201 proteases (Table S11), further supporting the importance of these gene functions in mucosal coloniza-  
202 tion.

203 Testing for clade-specific effects using within-phylum phylogenetic regression, we find K14440 and  
204 K14743 to be among the most significant hits in Firmicutes/Firmicutes\_A/Firmicutes\_C, while K00441,  
205 K14743 and K08217 are among the most significant hits for Bacteroidota (Table S9). As an external  
206 validation, we repeat our workflow using the Suez *et. al in vivo* dataset [15] to identify a list of KOs  
207 associated with mucosal enrichment (Table S10), and find statistically significant overlap between genes  
208 associated with microcosm enrichment *in vitro* and genes associated with mucosal enrichment *in vivo*,  
209 ( $\log - odds - ratio = 4.0, p = 9.7 \times 10^{-21}$ , Fig. S11). Thus, we confirm that measurements from  
210 our *in vitro* synthetic community cultures are sufficiently detailed to inform a computational gene-level  
211 analysis of gut spatial organization, revealing that genes related to biofilm formation and adhesion likely  
212 play key roles in modulating gut microbial structure.

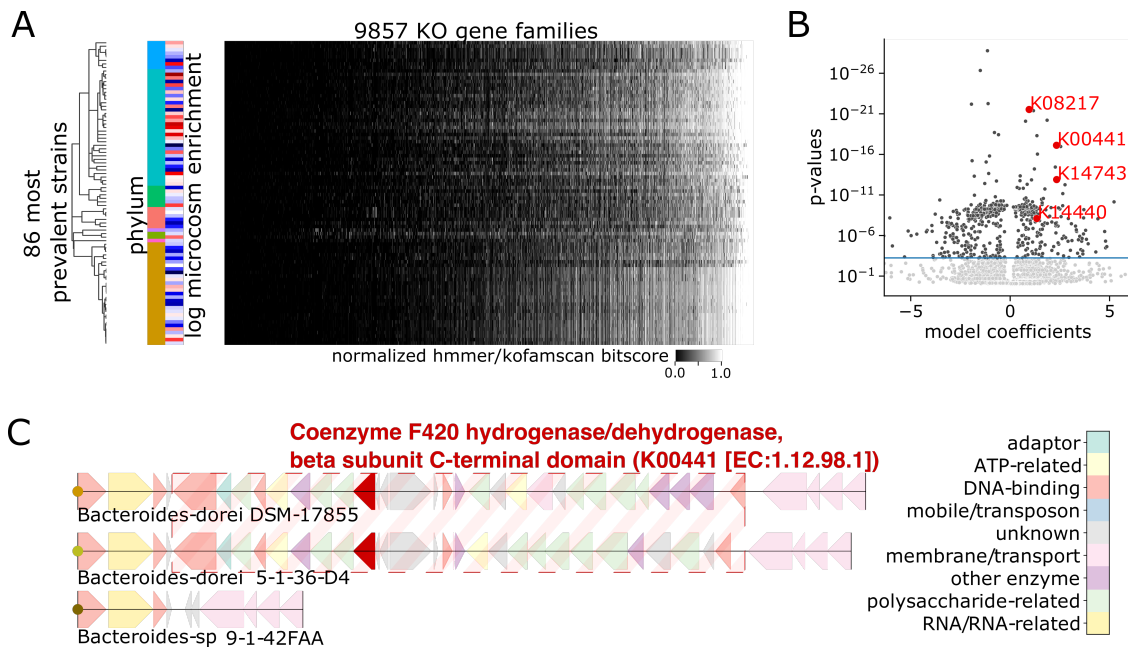

Figure 3: **Phylogenetic regression identifies genes associated with mucin microcosm enrichment**

**(A)** Phylogenetic regression identifies significant associations between log microcosm enrichment score (red/blue indicates positive/negative microcosm enrichment respectively) and gene presence absence patterns (lighter/darker shades of gray indicate gene presence/absence respectively) across the most prevalent 86 strains detected in passaged samples. We use this model to test a total of 9857 KEGG KO gene families determined using kofamscan [30], accounting for phylogenetic relatedness between strains assuming Brownian motion along evolutionary branches. **(B)** Volcano plot of phylogenetic regression test, where each dot represents one KEGG KO – horizontal line at FDR=0.01. Horizontal axis is clipped at 0.1 and 99.9 percentiles, highlighted gene families colored in red. **(C)** *Bacteroides dorei* 5-1-36-D4 and DSM-17855 both harbor a coenzyme F420 dehydrogenase gene (KEGG KO K00441, *hmmerbitscore* = 190.7, 188.7) colocalized amongst LPS/EPS related gene clusters – these features are collectively missing from the corresponding region in the *Bacteroides sp.* 9-1-42FAA genome.

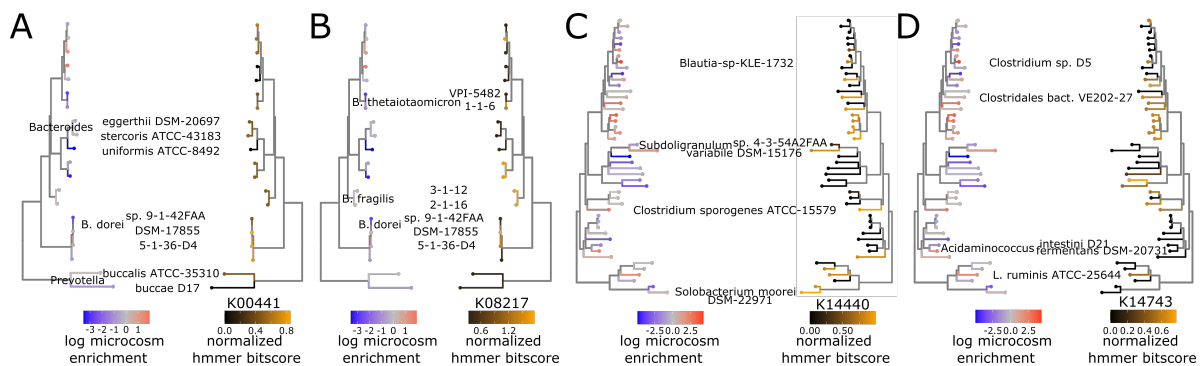

**Figure 4: PhyloIhm-identified gene families have presence patterns that align with differential microcosm enrichment (A)** Comparison of microcosm enrichment pattern (left) with gene presence pattern (right) of K00441 coenzyme F420 hydrogenase subunit beta [EC:1.12.98.1], across family Bacteroidaceae strains. **(B)** Comparison of microcosm enrichment pattern (left) with gene presence pattern (right) of K08217 MFS transporter, DHA3 family, macrolide efflux protein, across family Bacteroidaceae strains. **(C)** Comparison of microcosm enrichment pattern (left) with gene presence pattern (right) of K14743 membrane-anchored mycosin MYCP [EC:3.4.21.-], across phylum Firmicutes\_A, Firmicutes\_C, and Firmicutes strains. **(D)** Comparison of microcosm enrichment pattern (left) with gene presence pattern (right) of K14440 SWI/SNF-related matrix-associated actin-dependent regulator of chromatin subfamily A-like protein 1 [EC:5.6.2.-], across phylum Firmicutes\_A, Firmicutes\_C, and Firmicutes strains.

## 213 **Strain enrichment on microcosms is associated with presence of lipo/exopolysaccharide** 214 **biosynthesis gene clusters**

215 To explore mechanisms of community structure beyond individual genes, we next investigate microcosm  
216 enrichment of biosynthetic gene clusters (BGCs). We use deepBGC [61] to search for BGCs across our  
217 strain genomes, annotate BGCs based on their KEGG KO presence, and apply hierarchical clustering  
218 to categorize 1103 detected BGCs into 256 groups with similar KO co-occurrence patterns (Fig. 5A,  
219 Table S12). We then map presence/absence of each of these 256 BGC-groups against the 86 prevalent  
220 strains in our experiment (Fig. S12), and apply phylogenetic regression to test for associations between  
221 microcosm enrichment and BGC-groups.

222 Our approach yields a total of 7/256 significant BGC-groups positively associated with microcosm  
223 enrichment (Fig. 5B), the three largest of which consist of 18 or more BGC representatives (BGC-group  
224 157 – see Fig. 5C, BGC-group 120, and BGC-group 69). Filtering for the most common KEGG KOs in  
225 each of these BGC-groups, we discover that BGC-group 157 and BGC-group 120 consist of likely EPS  
226 related gene clusters, typified by glycosyltransferase, epimerase and other EPS related KOs (Fig 5D,  
227 Table S13). BGC-group 69 consists largely of gene clusters populated by membrane transporter genes.  
228 KOs in other microcosm enriched BGC-groups include more polysaccharide related genes (BGC-groups  
229 198, 186, 161) and AraC transcriptional regulator genes (BGC-group 34). These findings at the BGC-  
230 level further reinforce our KO-level results, showing that membrane-related functions such as LPS/EPS  
231 and transporters, as well as key gene regulators, likely regulate spatial organization in our *in vitro* model  
232 of the human gut.

## 233 **Discussion**

234 Applying mucin microcosm culture with our defined community of human gut strains, we present here  
235 the first strain-resolved measurements of spatial structure within the context of a complex gut microbial  
236 community. By *a priori* generating a database of high quality closed reference genomes, our approach  
237 enables high taxonomic resolution abundance measurements using metagenomic sequencing, while ef-  
238 fectively recapitulating spatial structure in the gut microbiome. These measurements show with high  
239 taxonomic resolution how a complex gut microbial community is spatially organized upon introduction

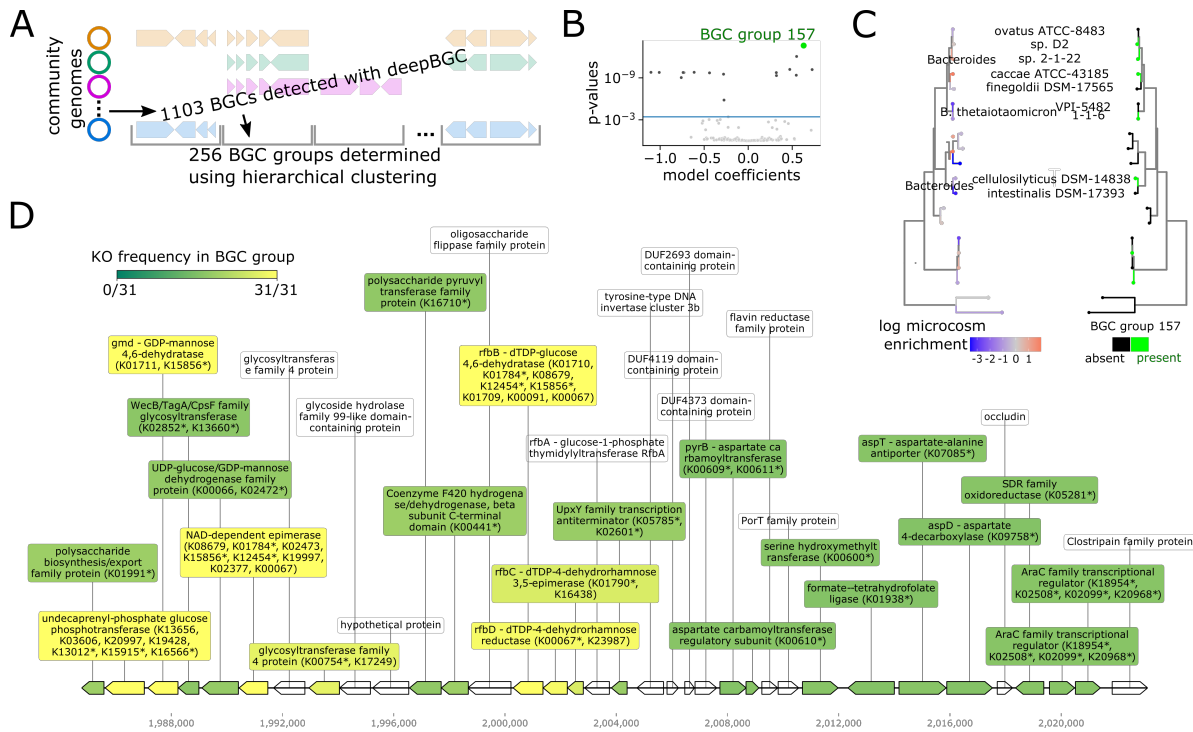

Figure 5: **Strain enrichment on mucin microcosms is associated with exopolysaccharide gene clusters.** (A) Schematic of approach used to generate and group BGCs across strains using deepBGC and hierarchical clustering. (B) Volcano plot of phylogenetic regression test, each dot represents one BGC-group, horizontal line at FDR=0.01 cutoff. Top hit BGC-group 157 highlighted in green. (C) Comparison of microcosm enrichment pattern (left) with presence pattern (right) of BGC-group 157 across strains in family Bacteroidaceae. (D) Example of a representative gene cluster in BGC-group 157 from the *Bacteroides* strain with highest microcosm enrichment score (*Bacteroides*-sp.2-1-22-cluster\_1\_1984776-2023109.1). Gene label colors reflect frequency of KO family among all BGCs in group – in cases where a gene maps to multiple KOs, \* marks mapped KO with highest frequency in BGC-group.



240 of microcosms, demonstrating that microcosms enhance community richness to a level similar to *in*  
241 *vivo* observations, including instances of co-existence between closely related strains. We find clear  
242 enrichment signals *within* microcosm cultures where certain strains prefer to grow on the microcosms  
243 versus in the supernatant, or vice versa. Microcosm enrichment phenotypes can differ significantly even  
244 between closely related strains, supporting our hypothesis that spatial organization in the gut occurs at  
245 strain-level and trends would be missed at coarser taxonomic resolution.

246 Another benefit of using strain-resolved metagenomics is that we can identify gene families that specifi-  
247 cally occur in strains with microcosm enrichment (or depletion) phenotypes. We do so using phylogenetic  
248 regression, a rigorous statistical approach that adjusts for evolutionary relationships between strains. This  
249 analysis identifies several gene families related to microbial adhesion and biofilm formation, including  
250 efflux pumps (e.g., K08217) that are known to mediate collective biofilm phenotypes such as quorum  
251 sensing and antibiotic resistance [44–50], and membrane proteases (e.g., K14743) which can enhance  
252 motility / colonization on surfaces [51–56]. We also find genes involved in biosynthesis of LPS/EPS  
253 which are known to mediate bacterial adhesion [39–43], such as glycosyltransferase and epimerase genes,  
254 as well as a particular gene family K00441 (coenzyme F420 hydrogenase subunit beta [EC:1.12.98.1])  
255 for which we report significant genomic colocalization with other known LPS/EPS genes, suggesting  
256 a previously uncharacterized functional link. We also find several groups of biosynthetic gene clusters  
257 containing membrane transporters and LPS/EPS genes associated with microcosm enrichment. Beyond  
258 membrane-associated functions, our analysis also highlights regulatory genes such as SWI/SNF DEAD  
259 box helicases (K14440). Intriguingly, such genes have not only been shown to be involved in biofilm  
260 formation [41, 57–60], but also specifically drive expression of efflux pumps and LPS/EPS genes [57].  
261 We speculate that in mucosa-associated taxa, key regulator genes act as master switches for a host of  
262 bacterial functions that alter outer membrane composition to enhance biophysical interactions with the  
263 mucosal surface and thus increase mucosal colonization fitness, leading to global spatial organization of  
264 these taxa towards the mucosa (Fig. 6).

265 We conclude by noting several limitations to our work and point to areas for further exploration. First,  
266 we only show statistical associations – not causal mechanisms – between genotypes and microcosm  
267 enrichment, meaning hits should be cautiously interpreted as potential genetic factors deserving of  
268 followup investigation. Synthetic biology in genetically tractable gut strains can be used to test our

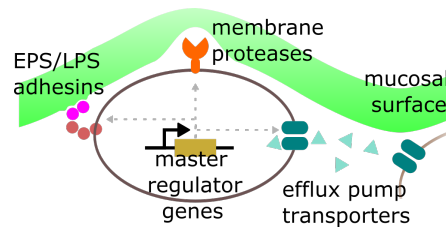

Figure 6: **Schema for how mucosal associated genes may regulate spatial structure.** Depiction of proposed framework where in mucosa-associated taxa, regulatory genes serve as master switches for microbial functions that increase mucosal colonization fitness such as LPS/EPS, membrane transporters / efflux pumps, and proteases.

269 predictions by altering the expression of identified gene families using gene knockout, knockdown or  
270 knockin experiments [62–64]. Second, while our *in vitro* results generally parallel those from earlier *in vivo*  
271 work [15, 26], we do find limited discrepancies (e.g., microcosm depletion of Actinobacteriota), meaning  
272 our current platform provides a close but still imperfect replica of the *in vivo* gut environment. More  
273 realistic culture conditions can be explored, potentially through modification of media conditions (e.g.,  
274 addition of bile acids, different carbon sources). Third, our current approach based on metagenomic  
275 sequencing provides accurate quantification of strain and gene abundance, but it does not assay gene  
276 expression or spatial localization on microcosms. Future work using gut microbial metatranscriptomic  
277 analysis [65, 66] and multiplexed FISH imaging [67–69] can greatly complement current capabilities and  
278 mitigate these shortcomings. Fourth, it remains unclear how strain-strain interactions affect structure.  
279 Follow-on studies with our platform that incorporate strain dropout can address these questions. Finally,  
280 in addition to strains from healthy Western guts, future work should incorporate taxa found in dysbiotic  
281 and non-Western guts to explore how spatial structure varies between healthy and diseased states, and  
282 across global geographic regions. Ultimately we believe the platform presented here has the potential  
283 to transform the standard for *in vitro* investigation of gut microbiota, in a manner that recognizes the  
284 important interplay between spatial structure and strain-level ecology.

## 285 **Methods**

### 286 **Hybrid assembly of microbial isolates**

287 Strains are cultured in isolation until stationary phase, followed by DNA extraction using phenol chlo-  
288 roform. DNA is sequenced using both Oxford Nanopore long-read and Illumina short-read sequencing,

289 followed by hybrid assembly using custom bioinformatic workflow (Fig. S2) built using Unicycler [70],  
290 RScf [71] and TGS-GapCloser [72] – workflow is available as docker images, see Software availability  
291 below.

## 292 **Community phylogeny**

293 Phylogenetic tree structure of the community is generated using GTDB-tk [73], using our genome  
294 assemblies as input.

## 295 **Genome annotation and gene classification**

296 Genomes are annotated using NCBI PGAP [74]. Predicted protein sequences are then mapped using  
297 kofamscan [30] to the to KEGG Orthology database.

## 298 **Mucin microcosm preparation**

299 Mucin microcosms are prepared similarly to previously described protocols [28, 75], using boiled 0.5%  
300 porcine mucin (Sigma M2378) and 1% agar (BD 214030) solution solidified onto K1 biofilm carriers (Evo-  
301 lution Aqua MEDIAK1). Mucin free agar-only microcosms are prepared using 1% agar solution.

## 302 ***In vitro* culture of synthetic community with mucin microcosms**

303 To construct the full *in vitro* synthetic community, we first culture each strain in isolation in 1.8 mL of its  
304 preferred media in a 96 well deep well plate (Table S1). Because of the large range of growth rates and  
305 stationary phase cell densities, strains are inoculated in a staggered fashion with slow growers inoculated 3  
306 days prior and fast growers inoculated 1 day before community assembly. Fastidious growers are cultured  
307 in 10 mL and concentrated to increase final cell density. Individual isolate cultures are sequenced to  
308 verify purity. On the day of community assembly, cell density for each strain is estimated using OD  
309 measured on a plate reader (BioTek Epoch). Using this measurement, each strain is normalized to a  
310 maximum OD of 0.3 using liquid handling robotics. Cultures are pelleted and washed with PBS, and  
311 then combined to form a mixture of 123 strains (epMotion 5073). Strains are combined in an anaerobic  
312 environment equipped with automated liquid handling in order to reduce potential cross contamination  
313 and other human errors when concurrently handling many strains (Fig. S3).

314 Following assembly of our bacterial community, the mixture is used to inoculate cultures in 15 mL  
315 tubes comprising MEGA media and 5 microcosms each. Cultures are left to grow at  $37^{\circ}\text{C}$  in anaerobic  
316 conditions for 3 days without agitation, at which point they are passaged. Passaging consists of trans-  
317 ferring a single microcosm from the old culture tube to a new culture tube. This process is repeated 5  
318 times for a total of 6 passages - for each subsequent passage, the previously transferred-in microcosm is  
319 discarded prior to transferring of a microcosm to the next culture. For liquid-only cultures, inoculating  
320 loops (Fisherbrand 01-189-165) are used for passaging. Supernatant pellets and microcosm samples are  
321 saved and frozen at each passage point.

322 For each condition, we culture the community in biological triplicate cultures (i.e. 3 separate culture  
323 tubes). Each culture tube is sampled with technical triplicates – for microcosm samples, we pick 3  
324 microcosms out of each culture tube to store at  $-80^{\circ}\text{C}$  prior to DNA extraction, while for supernatant  
325 and liquid-only cultures, we take 3 separate 1mL aliquots from each tube, pellet, then store at  $-80^{\circ}\text{C}$   
326 prior to DNA extraction. This yields a total of 9 read libraries for each passage and experimental  
327 condition. The initial inoculum communities are sampled in duplicate, each sample sequenced 3 times  
328 each.

### 329 **DNA extraction, Library prep and sequencing**

330 DNA is extracted from pellets and microcosms using ZymoBIOMICS 96 DNA Kit and bead beating with  
331 0.1mm glass beads (Benchmark Scientific D1031-01). Extracted DNA from each sample is quantified  
332 in 384 well plates on a fluorescent plate reader (BioTek Neo2) using the Quant-iT PicoGreen assay  
333 (ThermoFisher). To generate input DNA for our high-throughput and low-volume Nextera XT library  
334 preparation process, DNA samples are normalized to at maximum of 0.2 ng/ $\mu\text{L}$  in a 384 well plate using  
335 a low volume cherry picking liquid handler (SPT). Library preparation is done in 384 well plates using a  
336 low-volume 16 channel liquid handler (SPT) and follows the chemistry of the Nextera XT process but  
337 in a total volume of 4  $\mu\text{L}$  in order to reduce library preparation cost. Libraries are quantified again using  
338 the Quant-iT PicoGreen assay and normalized. After pooling and cleaning using Ampure XP beads  
339 (Beckman), libraries are sequenced on a Novaseq 6000 (Illumina) to a mean depth of  $1.2 \times 10^7$  read  
340 pairs per sample. In addition to DNA derived from microbial communities, we also sequenced all input  
341 strains used to construct the community to ensure strain purity and identity.

## 342 **Read mapping and abundance estimation**

343 Read mapping is performed with NinjaMap as previously described [27], using our de novo generated  
344 genomes as reference database. Briefly, reads are aligned to genome sequences, with only perfect  
345 unique matches considered in the first round. Ambiguous reads are held in escrow for the first round,  
346 and subsequently assigned in a statistically weighted manner determined by initial abundance estimates  
347 from the first round of alignment. This generates relative abundance and horizontal genome coverage  
348 estimates for each strain in each sample's read library. We consider a strain present in a sample if it  
349 exceeds a 1% horizontal coverage and 0.01% relative abundance cutoff. Out of all 270 passage samples  
350 (6 passages  $\times$  5 experimental conditions – mucin-agar microcosms, mucin-agar supernatant, plain-agar  
351 microcosms, plain-agar supernatant, no-microcosms –  $\times$  9 replicates), we use a prevalence cutoff of  
352 10% presence (i.e. present in 27 or more samples) to focus on the most prevalent strains. For down-  
353 stream abundance-related analysis, we collapse technical (i.e., within tube) triplicates to their median  
354 abundance measurements, while considering biological (different culture tubes) triplicate measurements  
355 separately. Table S2 lists relative abundance and horizontal coverage across strains, passages, replicates  
356 and experimental conditions.

## 357 **Mucosal enrichment calculations**

358 For each strain, and passage, microcosm enrichment scores are calculated as log ratio of microcosm to  
359 supernatant abundance, for 3 biological replicates, replacing zeros with half-minimum non-zero value  
360 prior to taking log. For each strain, a single aggregate microcosm is generated by taking the mean of  
361 over mean over standard deviation of 12 log ratio scores in the late passages (P3-6, 4 passages  $\times$  3  
362 biological replicates). Table S3 lists enrichment scores per strain.

## 363 **Gene neighborhood enrichment test**

364 Based on results from kofamscan for each gene in each genome, a gene is annotated with a KO-label  
365 if it exhibits overlap greater than  $0.5\times$  coverage with the KO's pHMM model, as well as a bitscore  
366 greater than  $0.5\times$  the KO's bitscore threshold. We count the frequency of all annotated KOs within 10  
367 kb of K00441-labeled genes across the full community genome database. To generate p-value estimate  
368 of this measured frequency, we compare it against a null distribution generated by 1000 random gene

369 order permutations. In each of these 1000 permutations, we randomly reassign gene labels within each  
370 of the 123 genomes prior to conducting frequency counts.  $p < 0.01$  indicates 990 or more times out of  
371 1000, the actual co-occurrence of a particular KO within 10 kb of K00441 is greater than random.

## 372 **Phylogenetic regression**

373 For each KO family, and each strain, we determine the maximum hmmer bitscore hit to the KO's pHMM  
374 out of all the strain's proteins. Aggregating across KOs and strains, this yields a strain-by-KO genotype  
375 matrix, where each entry is the highest bitscore value – higher bitscores indicate gene presence. We  
376 then test for association between this genotype and microcosm enrichment score (phenotype). While  
377 such genotype-phenotype tests are in many ways similar to those conducted in genome association  
378 studies (GWAS), the application of ordinary least squares (OLS) regression, often used in GWAS, is  
379 not appropriate here due to phylogenetic relationships between strains. These relationships mean that  
380 assumptions of independence between measurements inherent to OLS are violated. We confirm the  
381 presence of a non-star phylogeny between strains by generating a phylogenetic tree based on strain  
382 genomes, using bac120 multiple sequence alignment with GTDB-tk [73] (Fig. 1A). Therefore, to account  
383 for this phylogenetic relatedness, for each KO we apply phylogenetic regression to test for significant  
384 association between mucosal enrichment scores and maximum hmmer bitscore (standard scaled) across  
385 strains. We implement this test using the R package phylolm [32], assuming a Brownian motion  
386 model along evolutionary branches, using the bac120 phylogenetic tree as input. This generates effect  
387 size estimates and p-values for every KO. We filter KOs for significance applying a  $p < 0.01$  cutoff  
388 with Benjamini-Hochberg FDR correction. In addition to running phylogenetic regression across all 86  
389 prevalent strains, we also run these models across subsets of these strains grouped by phylum to search  
390 for clade-specific hits. For this analysis, we group Firmicutes, Firmicutes\_A, Firmicutes\_C phyla into a  
391 single clade.

## 392 **Comparison with *in vivo* dataset**

393 We analyze from the Suez 2018 [15] dataset all read libraries from untreated (i.e., naive) individuals, for  
394 whom lumen and mucosal reads were available from cecum, descending colon, and terminal ileum, i.e.,  
395 a total of 6 read libraries per individual. We first use Kneaddata (part of the Biobakery suite [76]) to

396 perform host (i.e. human) filtering of read sequences, resulting in 13 individuals for which all 6 libraries  
397 exceed a read depth of  $10^4$  reads (Table S6). For these 13 individuals, we obtain abundance estimates  
398 at all 6 sites by mapping reads to UHGG database using Kraken2 [2, 35]. We then calculate normalized  
399 mucosal enrichment scores for each species defined as log ratio of mucosal to lumen abundance. Score  
400 are normalized by taking mean-over-standard-deviation across all individuals and sites (13 individuals  $\times$   
401 3 sites – cecum, descending colon and terminal ileum – for 39 total measurements). We determine gene  
402 presence absence for these species, across KOs, by using kofamscan to search the UHGG pangenome  
403 database [2], and then apply phylogenetic regression as described above to test for associations be-  
404 tween gene presence absence and mucosal enrichment score across UHGG species. The regression uses  
405 enrichment scores from 676 species detected with greater than 0.01% relative abundance in at least  
406 10% of *in vivo* read libraries, which contain a total of 12,822 detected KEGG KO gene families (Table  
407 S7,S10).

#### 408 **Extraction and grouping of biosynthetic gene clusters using DeepBGC and hierarchical** 409 **clustering**

410 DeepBGC [61] is used to extract BGCs from our de novo genomes. For each identified BGC, we generate  
411 a list of present KOs based on if contained genes map to KO's pHMM with overlap greater than  $0.5 \times$   
412 coverage, as well as a bitscore greater than  $0.5 \times$  the KO's bitscore threshold. We filter out BGCs with  
413 fewer than 3 present KOs, and then use hierarchical clustering to cluster all remaining BGCs based  
414 on their binary KO presence/absence profile into 256 BGC-groups, applying a Jaccard distance metric.  
415 We then map presence of each BGC-group within community strains, and use this presence/absence  
416 matrix to test for associations with microcosm-enrichment applying phylogenetic regression as described  
417 above.

#### 418 **Data availability**

419 All sequencing data of this study is deposited in the Sequence Read Archive (SRA), accession codes  
420 pending. Genomes are deposited in Genbank (NCBI), also pending.

## 421 **Code availability**

422 Code used for analysis and visualization available at:

423 <https://github.com/xiaofanjin/gut-community-microcosms>

424 Software used for nanopore basecalling and hybrid assembly available at:

425 <https://github.com/czbiohub/microbiome-data-analysis/>

426 <https://github.com/FischbachLab/nf-hybridassembly>

## 427 **Ethics declarations**

### 428 **Competing interests**

429 The authors declare that they have no competing interests.

## 430 **Acknowledgements**

431 We thank A. Lind, P. Bradley, A. Bustion, and I.H. Riedel-Kruse for helpful discussions regarding data  
432 analysis and feedback on the manuscript, A. Cheng and M. Fischbach for sharing bacterial strains, and  
433 S. Jain and X. Meng for help building the genome assembly framework. This work is supported by  
434 funding from Chan Zuckerberg Biohub, Gladstone Institutes, NSF grant #1563159.

## 435 **Author's contributions**

436 XJ, BY and KP contributed to the design and implementation of the research, to the analysis of the  
437 results and to the writing of the manuscript. JY and AW contributed to the implementation of the  
438 research.



## References

- 439
- 440 [1] Wei-Lin Wang, Shao-Yan Xu, Zhi-Gang Ren, Liang Tao, Jian-Wen Jiang, and Shu-Sen Zheng.  
441 Application of metagenomics in the human gut microbiome. *World journal of gastroenterology*,  
442 21(3):803–814, jan 2015.
- 443 [2] Alexandre Almeida, Stephen Nayfach, Miguel Boland, Francesco Strozzi, Martin Beracochea,  
444 Zhou Jason Shi, Katherine S Pollard, Ekaterina Sakharova, Donovan H Parks, Philip Hugenholtz,  
445 Nicola Segata, Nikos C Kyrpides, and Robert D Finn. A unified catalog of 204,938 reference  
446 genomes from the human gut microbiome. *Nature Biotechnology*, 39(1):105–114, 2021.
- 447 [3] Petar Scepanovic, Flavia Hodel, Stanislas Mondot, Valentin Partula, Allyson Byrd, Christian Ham-  
448 mer, Cécile Alanio, Jacob Bergstedt, Etienne Patin, Mathilde Touvier, Olivier Lantz, Matthew L  
449 Albert, Darragh Duffy, Lluís Quintana-Murci, Jacques Fellay, Laurent Abel, Andres Alcover, Hugues  
450 Aschard, Kalla Astrom, Philippe Bousso, Pierre Bruhns, Ana Cumano, Caroline Demangel, Ludovic  
451 Deriano, James Di Santo, Françoise Dromer, Darragh Duffy, Gérard Eberl, Jost Enninga, Jacques  
452 Fellay, Odile Gelpi, Ivo Gomperts-Boneca, Milena Hasan, Serge Hercberg, Olivier Lantz, Claude  
453 Leclerc, Hugo Mouquet, Sandra Pellegrini, Stanislas Pol, Antonio Rausell, Lars Rogge, Anavaj  
454 Sakuntabhai, Olivier Schwartz, Benno Schwikowski, Spencer Shorte, Vassili Soumelis, Frédéric  
455 Tangy, Eric Tartour, Antoine Toubert, Mathilde Touvier, Marie-Noëlle Ungeheuer, Matthew L Al-  
456 bert, Lluís Quintana-Murci, and The Milieu Intérieur Consortium. A comprehensive assessment  
457 of demographic, environmental, and host genetic associations with gut microbiome diversity in  
458 healthy individuals. *Microbiome*, 7(1):130, 2019.
- 459 [4] Carey D. Nadell, Knut Drescher, and Kevin R. Foster. Spatial structure, cooperation and compe-  
460 tition in biofilms. *Nature Reviews Microbiology*, 14(9):589–600, 2016.
- 461 [5] Carolina Tropini, Kristen A Earle, Kerwyn Casey Huang, and Justin L Sonnenburg. The Gut  
462 Microbiome: Connecting Spatial Organization to Function. *Cell Host and Microbe*, 21(4):433–  
463 442, apr 2017.
- 464 [6] Kudelka Matthew R., Hinrichs Benjamin H., Darby Trevor, Moreno Carlos S., Nishio Hikaru, Cut-  
465 ler Christopher E., Wang Jianmei, Wu Huixia, Zeng Junwei, Wang Yingchun, Ju Tongzhong,  
466 Stowell Sean R., Nusrat Asma, Jones Rheinallt M., Neish Andrew S., and Cummings Richard

- 467 D. Cosmc is an X-linked inflammatory bowel disease risk gene that spatially regulates gut mi-  
468 crobiota and contributes to sex-specific risk. *Proceedings of the National Academy of Sciences*,  
469 113(51):14787–14792, dec 2016.
- 470 [7] Weiguang Chen, Fanlong Liu, Zongxin Ling, Xiaojuan Tong, and Charlie Xiang. Human Intesti-  
471 nal Lumen and Mucosa-Associated Microbiota in Patients with Colorectal Cancer. *PLOS ONE*,  
472 7(6):e39743, jun 2012.
- 473 [8] Ian M Carroll, Young-Hyo Chang, Jiwon Park, R Balfour Sartor, and Yehuda Ringel. Luminal  
474 and mucosal-associated intestinal microbiota in patients with diarrhea-predominant irritable bowel  
475 syndrome. *Gut Pathogens*, 2(1):19, 2010.
- 476 [9] Maximilian Baumgartner, Michaela Lang, Hunter Holley, Daniel Crepez, Bela Hausmann, Petra  
477 Pjevac, Doris Moser, Felix Haller, Fabian Hof, Andrea Beer, Elisabeth Orgler, Adrian Frick, Vineeta  
478 Khare, Rayko Evstatiev, Susanne Strohmaier, Christian Primas, Werner Dolak, Thomas Köcher,  
479 Kristaps Klavins, Timo Rath, Markus F Neurath, David Berry, Athanasios Makristathis, Markus  
480 Muttenthaler, and Christoph Gasche. Mucosal Biofilms Are an Endoscopic Feature of Irritable  
481 Bowel Syndrome and Ulcerative Colitis. *Gastroenterology*, 161(4):1245–1256.e20, oct 2021.
- 482 [10] Gopanandan Parthasarathy, Jun Chen, Xianfeng Chen, Nicholas Chia, Helen M O’Connor, Patri-  
483 cia G Wolf, H Rex Gaskins, and Adil E Bharucha. Relationship Between Microbiota of the Colonic  
484 Mucosa vs Feces and Symptoms, Colonic Transit, and Methane Production in Female Patients  
485 With Chronic Constipation. *Gastroenterology*, 150(2):367–379.e1, feb 2016.
- 486 [11] Sandra Macfarlane, Bahram Bahrami, and George T Macfarlane. *Mucosal biofilm communities in*  
487 *the human intestinal tract.*, volume 75. Elsevier Inc., 1 edition, jan 2011.
- 488 [12] Erwin G Zoetendal, Atte von Wright, Terttu Vilpponen-Salmela, Kaouther Ben-Amor, Antoon D L  
489 Akkermans, and Willem M de Vos. Mucosa-associated bacteria in the human gastrointestinal tract  
490 are uniformly distributed along the colon and differ from the community recovered from feces.  
491 *Applied and environmental microbiology*, 68(7):3401–3407, jul 2002.
- 492 [13] Gerardo M Nava, Hans J Friedrichsen, and Thaddeus S Stappenbeck. Spatial organization of  
493 intestinal microbiota in the mouse ascending colon. *The ISME Journal*, 5(4):627–638, 2011.

- 494 [14] Koji Yasuda, Keunyoung Oh, Boyu Ren, Timothy L Tickle, Eric A Franzosa, Lynn M Wachtman,  
495 Andrew D Miller, Susan V Westmoreland, Keith G Mansfield, Eric J Vallender, Gregory M Miller,  
496 James K Rowlett, Dirk Gevers, Curtis Huttenhower, and Xochitl C Morgan. Biogeography of the  
497 intestinal mucosal and luminal microbiome in the rhesus macaque. *Cell Host and Microbe*,  
498 17(3):385–391, mar 2015.
- 499 [15] Jotham Suez, Zamir Halpern, Eran Segal, and Eran Elinav. Personalized Gut Mucosal Colonization  
500 Resistance to Empiric Probiotics Is Associated with Unique Host and Microbiome Features Article  
501 Personalized Gut Mucosal Colonization Resistance to Empiric Probiotics Is Associated with Unique  
502 Host and Microbiome Feat. *Cell*, 174(6):1388–1405.e21, 2018.
- 503 [16] Stefania Vaga, Sunjae Lee, Boyang Ji, Anna Andreasson, Nicholas J Talley, Lars Agréus, Gho-  
504 lamreza Bidkhorji, Petia Kovatcheva-Datchary, Junseok Park, Doheon Lee, Gordon Proctor,  
505 Stanislav Dusko Ehrlich, Jens Nielsen, Lars Engstrand, and Saeed Shoaie. Compositional and  
506 functional differences of the mucosal microbiota along the intestine of healthy individuals. *Scien-  
507 tific Reports*, 10(1):14977, 2020.
- 508 [17] Ivaylo I Ivanov, Rosa de Llanos Frutos, Nicolas Manel, Keiji Yoshinaga, Daniel B Rifkin, R Balfour  
509 Sartor, B Brett Finlay, and Dan R Littman. Specific Microbiota Direct the Differentiation of  
510 IL-17-Producing T-Helper Cells in the Mucosa of the Small Intestine. *Cell Host and Microbe*,  
511 4(4):337–349, oct 2008.
- 512 [18] Koji Atarashi, Takeshi Tanoue, Minoru Ando, Nobuhiko Kamada, Yuji Nagano, Seiko Narushima,  
513 Wataru Suda, Akemi Imaoka, Hiromi Setoyama, Takashi Nagamori, Eiji Ishikawa, Tatsuichiro  
514 Shima, Taeko Hara, Shoichi Kado, Toshi Jinnohara, Hiroshi Ohno, Takashi Kondo, Kiminori Toy-  
515 ooka, Eiichiro Watanabe, Shin-ichiro Yokoyama, Shunji Tokoro, Hiroshi Mori, Yurika Noguchi,  
516 Hidetoshi Morita, Ivaylo I. Ivanov, Tsuyoshi Sugiyama, Gabriel Nuñez, J. Gray Camp, Masahira  
517 Hattori, Yoshinori Umesaki, and Kenya Honda. Th17 Cell Induction by Adhesion of Microbes to  
518 Intestinal Epithelial Cells. *Cell*, 163(2):367–380, oct 2015.
- 519 [19] Round June L. and Mazmanian Sarkis K. Inducible Foxp3+ regulatory T-cell development by  
520 a commensal bacterium of the intestinal microbiota. *Proceedings of the National Academy of  
521 Sciences*, 107(27):12204–12209, jul 2010.

- 522 [20] Gregory P Donaldson, S Melanie Lee, and Sarkis K Mazmanian. Gut biogeography of the bacterial  
523 microbiota. *Nature reviews. Microbiology*, 14(1):20–32, jan 2016.
- 524 [21] G P Donaldson, M S Ladinsky, K B Yu, J G Sanders, B B Yoo, W-C Chou, M E Conner, A M  
525 Earl, R Knight, P J Bjorkman, and S K Mazmanian. Gut microbiota utilize immunoglobulin A for  
526 mucosal colonization. *Science (New York, N.Y.)*, 360(6390):795–800, may 2018.
- 527 [22] Siegfried Schloissnig, Manimozhayan Arumugam, Shinichi Sunagawa, Makedonka Mitreva, Julien  
528 Tap, Ana Zhu, Alison Waller, Daniel R Mende, Jens Roat Kultima, John Martin, Karthik Kota,  
529 Shamil R Sunyaev, George M Weinstock, and Peer Bork. Genomic variation landscape of the  
530 human gut microbiome. *Nature*, 493(7430):45–50, 2013.
- 531 [23] Paul I Costea, Luis Pedro Coelho, Shinichi Sunagawa, Robin Munch, Jaime Huerta-Cepas, Kristoffer  
532 Forslund, Falk Hildebrand, Almagul Kushugulova, Georg Zeller, and Peer Bork. Subspecies in the  
533 global human gut microbiome. *Molecular Systems Biology*, 13(12):960, dec 2017.
- 534 [24] Duy T Truong, Adrian Tett, Edoardo Pasolli, Curtis Huttenhower, and Nicola Segata. Micro-  
535 bial strain-level population structure and genetic diversity from metagenomes. *Genome Research*,  
536 27(4):gr.216242.116—638, feb 2017.
- 537 [25] Nandita R Garud, Benjamin H Good, Oskar Hallatschek, and Katherine S Pollard. Evolutionary  
538 dynamics of bacteria in the gut microbiome within and across hosts. *PLoS biology*, 17(1):e3000102,  
539 2019.
- 540 [26] Alice G Cheng, Andrés Aranda-Díaz, Sunit Jain, Feiqiao Yu, Mikhail Iakiviak, Xiandong Meng,  
541 Allison Weakley, Advait Patil, Anthony L Shiver, Adam Deutschbauer, Norma Neff, Kerwyn Casey  
542 Huang, and Michael A Fischbach. Systematic dissection of a complex gut bacterial community.  
543 *bioRxiv*, page 2021.06.15.448618, jan 2021.
- 544 [27] Alice G Cheng, Po-Yi Ho, Sunit Jain, Xiandong Meng, Min Wang, Feiqiao Brian Yu, Mikhail  
545 Iakiviak, Ariel R Brumbaugh, Kazuki Nagashima, Aishan Zhao, Advait Patil, Katayoon Atabakhsh,  
546 Allison Weakley, Jia Yan, Steven Higginbottom, Norma Neff, Justin L Sonnenburg, Kerwyn Casey  
547 Huang, and Michael A Fischbach. In vivo augmentation of a complex gut bacterial community.  
548 *bioRxiv*, page 2021.06.15.448620, jan 2021.

- 549 [28] Pieter Van den Abbeele, Stefan Roos, Venessa Eeckhaut, Donald A MacKenzie, Melanie Derde,  
550 Willy Verstraete, Massimo Marzorati, Sam Possemiers, Barbara Vanhoecke, Filip Van Immerseel,  
551 and Tom Van de Wiele. Incorporating a mucosal environment in a dynamic gut model results in a  
552 more representative colonization by lactobacilli. *Microbial biotechnology*, 5(1):106–115, jan 2012.
- 553 [29] LinShu Liu, Jenni Firrman, Ceylan Tanes, Kyle Bittinger, Audrey Thomas-Gahring, Gary D Wu,  
554 Pieter Van den Abbeele, and Peggy M Tomasula. Establishing a mucosal gut microbial community  
555 in vitro using an artificial simulator. *PLOS ONE*, 13(7):e0197692, jul 2018.
- 556 [30] Takuya Aramaki, Romain Blanc-Mathieu, Hisashi Endo, Koichi Ohkubo, Minoru Kanehisa, Susumu  
557 Goto, and Hiroyuki Ogata. KofamKOALA: KEGG Ortholog assignment based on profile HMM and  
558 adaptive score threshold. *Bioinformatics*, 36(7):2251–2252, apr 2020.
- 559 [31] Alan Grafen and William Donald Hamilton. The phylogenetic regression. *Philosophical Transactions*  
560 *of the Royal Society of London. B, Biological Sciences*, 326(1233):119–157, dec 1989.
- 561 [32] Lam Si Tung Ho and Cecile Ane. A linear-time algorithm for Gaussian and non-Gaussian trait  
562 evolution models. *Systematic Biology*, 63:397–408, 2014.
- 563 [33] Patrick H Bradley, Stephen Nayfach, and Katherine S Pollard. Phylogeny-corrected identification  
564 of microbial gene families relevant to human gut colonization. *PLOS Computational Biology*,  
565 14(8):e1006242+, aug 2018.
- 566 [34] Qiang Tang, Ge Jin, Gang Wang, Tianyu Liu, Xiang Liu, Bangmao Wang, and Hailong Cao. Current  
567 Sampling Methods for Gut Microbiota: A Call for More Precise Devices. *Frontiers in cellular and*  
568 *infection microbiology*, 10:151, apr 2020.
- 569 [35] Derrick E Wood, Jennifer Lu, and Ben Langmead. Improved metagenomic analysis with Kraken 2.  
570 *Genome Biology*, 20(1):257, 2019.
- 571 [36] Bjarke B Christensen, Janus A J Haagenen, Arne Heydorn, and Søren Molin. Metabolic com-  
572 mensalism and competition in a two-species microbial consortium. *Applied and environmental*  
573 *microbiology*, 68(5):2495–2502, 2002.
- 574 [37] Jan-Ulrich Kreft. Biofilms promote altruism. *Microbiology (Reading, England)*, 150(Pt 8):2751–60,  
575 aug 2004.

- 576 [38] Sivan Elias and Ehud Banin. Multi-species biofilms: living with friendly neighbors. *FEMS micro-*  
577 *biology reviews*, jan 2012.
- 578 [39] Ian W Sutherland. Biofilm exopolysaccharides: a strong and sticky framework. *Microbiology*,  
579 147(1):3–9, 2001.
- 580 [40] Barbara Vu, Miao Chen, Russell J Crawford, and Elena P Ivanova. Bacterial extracellular polysac-  
581 charides involved in biofilm formation. *Molecules*, 14(7):2535–2554, 2009.
- 582 [41] Tu Quoc Patrick H., Genevaux Pierre, Pajunen Maria, Savilahti Harri, Georgopoulos Costa, Schren-  
583 zel Jacques, and Kelley William L. Isolation and Characterization of Biofilm Formation-Defective  
584 Mutants of *Staphylococcus aureus*. *Infection and Immunity*, 75(3):1079–1088, mar 2007.
- 585 [42] X. Wang, J. F. Preston, and T. Romeo. The pgaABCD Locus of *Escherichia coli* Promotes the  
586 Synthesis of a Polysaccharide Adhesin Required for Biofilm Formation. *Journal of Bacteriology*,  
587 186(9):2724–2734, apr 2004.
- 588 [43] Dominique H Limoli, Christopher J Jones, and Daniel J Wozniak. Bacterial extracellular polysac-  
589 charides in biofilm formation and function. *Microbiology spectrum*, 3(3):3, 2015.
- 590 [44] Kvist Malin, Hancock Viktoria, and Klemm Per. Inactivation of Efflux Pumps Abolishes Bacterial  
591 Biofilm Formation. *Applied and Environmental Microbiology*, 74(23):7376–7382, dec 2008.
- 592 [45] Thithiwat May, Akinobu Ito, and Satoshi Okabe. Induction of multidrug resistance mechanism in  
593 *Escherichia coli* biofilms by interplay between tetracycline and ampicillin resistance genes. *Antimi-*  
594 *crobial agents and chemotherapy*, 53(11):4628–4639, nov 2009.
- 595 [46] Kayo Matsumura, Soichi Furukawa, Hirokazu Ogihara, and Yasushi Morinaga. Roles of multidrug  
596 efflux pumps on the biofilm formation of *Escherichia coli* K-12. *Biocontrol science*, 16(2):69–72,  
597 2011.
- 598 [47] Stephanie Baugh, Aruna S Ekanayaka, Laura J V Piddock, and Mark A Webber. Loss of or  
599 inhibition of all multidrug resistance efflux pumps of *Salmonella enterica* serovar Typhimurium  
600 results in impaired ability to form a biofilm. *Journal of Antimicrobial Chemotherapy*, 67(10):2409–  
601 2417, oct 2012.

- 602 [48] Ilyas Alav, J Mark Sutton, and Khondaker Miraz Rahman. Role of bacterial efflux pumps in biofilm  
603 formation. *Journal of Antimicrobial Chemotherapy*, 73(8):2003–2020, aug 2018.
- 604 [49] Stefano Sabatini, Miranda Piccioni, Tommaso Felicetti, Stefania De Marco, Giuseppe Manfroni,  
605 Rita Pagiotti, Morena Nocchetti, Violetta Cecchetti, and Donatella Pietrella. Investigation on  
606 the effect of known potent *S. aureus* NorA efflux pump inhibitors on the staphylococcal biofilm  
607 formation. *RSC Advances*, 7(59):37007–37014, 2017.
- 608 [50] Martina Pasqua, Milena Grossi, Alessandro Zennaro, Giulia Fanelli, Gioacchino Micheli, Frederic  
609 Barras, Bianca Colonna, and Gianni Prosseda. The Varied Role of Efflux Pumps of the MFS Family  
610 in the Interplay of Bacteria with Animal and Plant Cells. *Microorganisms*, 7(9):285, aug 2019.
- 611 [51] Kazuo Kobayashi and Yukako Ikemoto. Biofilm-associated toxin and extracellular protease coop-  
612 eratively suppress competitors in *Bacillus subtilis* biofilms. *PLOS Genetics*, 15(10):e1008232, oct  
613 2019.
- 614 [52] Jennifer M Pang, Emilie Layre, Lindsay Sweet, Ashley Sherrid, D Branch Moody, Anil Ojha,  
615 and David R Sherman. The polyketide Pks1 contributes to biofilm formation in *Mycobacterium*  
616 *tuberculosis*. *Journal of bacteriology*, 194(3):715–721, feb 2012.
- 617 [53] Mariah Bindel Connelly, Glenn M Young, and Alan Sloma. Extracellular proteolytic activity plays a  
618 central role in swarming motility in *Bacillus subtilis*. *Journal of bacteriology*, 186(13):4159–4167,  
619 jul 2004.
- 620 [54] Ana Yepes, Johannes Schneider, Benjamin Mielich, Gudrun Koch, Juan-Carlos García-Betancur,  
621 Kumaran S Ramamurthi, Hera Vlamakis, and Daniel López. The biofilm formation defect of  
622 a *Bacillus subtilis* flotillin-defective mutant involves the protease FtsH. *Molecular Microbiology*,  
623 86(2):457–471, oct 2012.
- 624 [55] Shubhada R Hegde. Computational Identification of the Proteins Associated With Quorum Sensing  
625 and Biofilm Formation in *Mycobacterium tuberculosis* , 2020.
- 626 [56] Holger Rohde, Christoph Burdelski, Katrin Bartscht, Muzaffar Hussain, Friedrich Buck, Matthias A  
627 Horstkotte, Johannes K.-M. Knobloch, Christine Heilmann, Mathias Herrmann, and Dietrich  
628 Mack. Induction of *Staphylococcus epidermidis* biofilm formation via proteolytic processing of

629 the accumulation-associated protein by staphylococcal and host proteases. *Molecular Microbiol-*  
630 *ogy*, 55(6):1883–1895, mar 2005.

631 [57] S V Lynch, L Dixon, M R Benoit, E L Brodie, M Keyhan, P Hu, D F Ackerley, G L Andersen,  
632 and A Matin. Role of the rapA gene in controlling antibiotic resistance of Escherichia coli biofilms.  
633 *Antimicrobial agents and chemotherapy*, 51(10):3650–3658, oct 2007.

634 [58] Laís Moreira Granato, Simone Cristina Picchi, Maxuel de Oliveira Andrade, Marco Aurélio Takita,  
635 Alessandra Alves de Souza, Nian Wang, and Marcos Antonio Machado. The ATP-dependent RNA  
636 helicase HrpB plays an important role in motility and biofilm formation in Xanthomonas citri subsp.  
637 citri. *BMC microbiology*, 16:55, mar 2016.

638 [59] Stella Oun, Peter Redder, Jean-Philippe Didier, Patrice François, Anna-Rita Corvaglia, Elena But-  
639 tazzoni, Caroline Giraud, Myriam Girard, Jacques Schrenzel, and Patrick Linder. The CshA DEAD-  
640 box RNA helicase is important for quorum sensing control in Staphylococcus aureus. *RNA biology*,  
641 10(1):157–165, jan 2013.

642 [60] Stéphane Hausmann, Diego Gonzalez, Johan Geiser, and Martina Valentini. The DEAD-box RNA  
643 helicase RhIE2 is a global regulator of Pseudomonas aeruginosa lifestyle and pathogenesis. *Nucleic*  
644 *Acids Research*, 49(12):6925–6940, jul 2021.

645 [61] Geoffrey D Hannigan, David Prihoda, Andrej Palicka, Jindrich Soukup, Ondrej Klempir, Lena  
646 Rampula, Jindrich Durcak, Michael Wurst, Jakub Kotowski, Dan Chang, Rurun Wang, Grazia  
647 Piizzi, Gergely Temesi, Daria J Hazuda, Christopher H Woelk, and Danny A Bitton. A deep  
648 learning genome-mining strategy for biosynthetic gene cluster prediction. *Nucleic Acids Research*,  
649 47(18):e110–e110, oct 2019.

650 [62] Linggang Zheng, Yang Tan, Yucan Hu, Juntao Shen, Zepeng Qu, Xianbo Chen, Chun Loong Ho,  
651 Elaine Lai-Han Leung, Wei Zhao, and Lei Dai. CRISPR/Cas-Based Genome Editing for Human  
652 Gut Commensal Bacteroides Species. *ACS Synthetic Biology*, 11(1):464–472, jan 2022.

653 [63] Mark Mimee, Alex C Tucker, Christopher A Voigt, and Timothy K Lu. Programming a Human  
654 Commensal Bacterium, Bacteroides thetaiotaomicron, to Sense and Respond to Stimuli in the  
655 Murine Gut Microbiota. *Cell systems*, 1(1):62–71, jul 2015.



- 656 [64] Guo Chun-Jun, Allen Breanna M., Hiam Kamir J., Dodd Dylan, Van Treuren Will, Higginbottom  
657 Steven, Nagashima Kazuki, Fischer Curt R., Sonnenburg Justin L., Spitzer Matthew H., and  
658 Fischbach Michael A. Depletion of microbiome-derived molecules in the host using Clostridium  
659 genetics. *Science*, 366(6471):eaav1282, dec 2019.
- 660 [65] Eric A Franzosa, Xochitl C Morgan, Nicola Segata, Levi Waldron, Joshua Reyes, Ashlee M Earl,  
661 Georgia Giannoukos, Matthew R Boylan, Dawn Ciulla, Dirk Gevers, Jacques Izard, Wendy S Garrett,  
662 Andrew T Chan, and Curtis Huttenhower. Relating the metatranscriptome and metagenome of the  
663 human gut. *Proceedings of the National Academy of Sciences of the United States of America*,  
664 111(22):E2329—E2338, jun 2014.
- 665 [66] Stavros Bashiardes, Gili Zilberman-Schapira, and Eran Elinav. Use of Metatranscriptomics in  
666 Microbiome Research. *Bioinformatics and biology insights*, 10:19–25, apr 2016.
- 667 [67] Kristen A Earle, Gabriel Billings, Michael Sigal, Joshua S Lichtman, Gunnar C Hansson, Joshua E  
668 Elias, Manuel R Amieva, Kerwyn Casey Huang, and Justin L Sonnenburg. Quantitative imaging  
669 of gut microbiota spatial organization. *Cell Host and Microbe*, 18(4):478–488, 2015.
- 670 [68] Mark Welch Jessica L., Hasegawa Yuko, McNulty Nathan P., Gordon Jeffrey I., and Borisy Gary  
671 G. Spatial organization of a model 15-member human gut microbiota established in gnotobiotic  
672 mice. *Proceedings of the National Academy of Sciences*, 114(43):E9105–E9114, oct 2017.
- 673 [69] Hao Shi, Qiaojuan Shi, Benjamin Grodner, Joan Sesing Lenz, Warren R Zipfel, Ilana Lauren Brito,  
674 and Iwijn De Vlaminc. Highly multiplexed spatial mapping of microbial communities. *Nature*,  
675 588(7839):676–681, dec 2020.
- 676 [70] Ryan R Wick, Louise M Judd, Claire L Gorrie, and Kathryn E Holt. Unicycler: Resolving bac-  
677 terial genome assemblies from short and long sequencing reads. *PLOS Computational Biology*,  
678 13(6):e1005595, jun 2017.
- 679 [71] Mao Qin, Shigang Wu, Alun Li, Fengli Zhao, Hu Feng, Lulu Ding, and Jue Ruan. LRScaf: improving  
680 draft genomes using long noisy reads. *BMC genomics*, 20(1):1–12, 2019.
- 681 [72] Mengyang Xu, Lidong Guo, Shengqiang Gu, Ou Wang, Rui Zhang, Brock A Peters, Guangyi Fan,  
682 Xin Liu, Xun Xu, and Li Deng. TGS-GapCloser: a fast and accurate gap closer for large genomes

- 683 with low coverage of error-prone long reads. *GigaScience*, 9(9):giaa094, 2020.
- 684 [73] Pierre-Alain Chaumeil, Aaron J Mussig, Philip Hugenholtz, and Donovan H Parks. GTDB-Tk: a  
685 toolkit to classify genomes with the Genome Taxonomy Database. *Bioinformatics*, 36(6):1925–  
686 1927, mar 2020.
- 687 [74] Tatiana Tatusova, Michael DiCuccio, Azat Badretdin, Vyacheslav Chetvernin, Eric P Nawrocki,  
688 Leonid Zaslavsky, Alexandre Lomsadze, Kim D Pruitt, Mark Borodovsky, and James Ostell. NCBI  
689 prokaryotic genome annotation pipeline. *Nucleic acids research*, 44(14):6614–6624, aug 2016.
- 690 [75] Jenni Firrman, LinShu Liu, Pieter Van den Abbeele, Ceylan Tanes, Kyle Bittinger, and Peggy  
691 Tomasula. Applying advanced in vitro culturing technology to study the human gut microbiota.  
692 *JoVE (Journal of Visualized Experiments)*, (144):e59054, 2019.
- 693 [76] Francesco Beghini, Lauren J Mclver, Aitor Blanco-Míguez, Leonard Dubois, Francesco Asnicar,  
694 Sagun Maharjan, Ana Mailyan, Paolo Manghi, Matthias Scholz, Andrew Maltez Thomas, Mireia  
695 Valles-Colomer, George Weingart, Yancong Zhang, Moreno Zolfo, Curtis Huttenhower, Eric A  
696 Franzosa, and Nicola Segata. Integrating taxonomic, functional, and strain-level profiling of diverse  
697 microbial communities with bioBakery 3. *eLife*, 10:e65088, 2021.
